# Supplementary material for: The current status of hydrogen storage in metal–organic frameworks
Source: Royal Society of Chemistry journal article supplement (doi:10.1039/b808322n), 2008-01-01
Supplement: b808322n.pdf [file b808322n.pdf]

Supporting information

## The Current Status of Hydrogen Storage in Metal-Organic Frameworks

Dan Zhao, Daqiang Yuan and Hong-Cai Zhou\*

Abbreviation, full name and chemical structure of the ligands listed in table 1

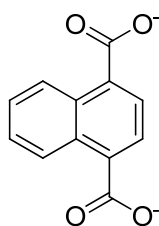

**1,4-ndc**

1,4-naphthalenedicarboxylate

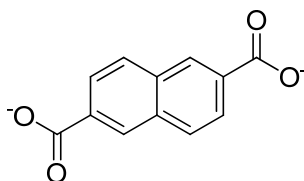

**2,6-ndc**

2,6-naphthalenedicarboxylate

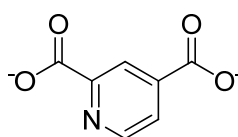

**2,4-pdc**

2,4-pyridinedicarboxylate

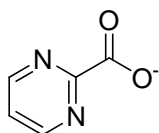

**2-pmc**

2-pyrimidinecarboxylate

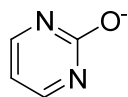

**2-pymo**  
2-pyrimidinolate

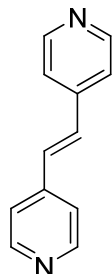

**4,4'-bpe**  
4,4'-trans-bis(4-pyridyl)-ethylene

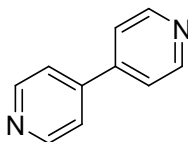

**4,4'-bipy**  
4,4'-bipyridine

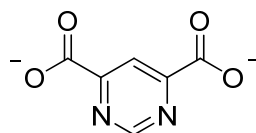

**4,6-pmdc**  
4,6-pyrimidicarboxylate

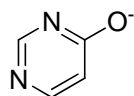

**4-pymo**  
4-pyrimidinolate

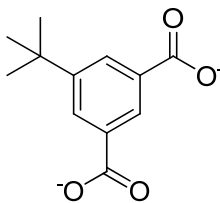

**5-bbdc**  
5-tert-butyl-1,3-benzenedicarboxylate

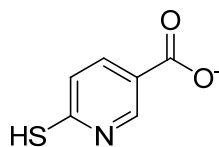

**6-mna**

6-mercapto-3-pyridinecarboxylate

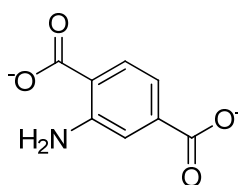

**abdc**

2-aminobenzene-1,4-dicarboxylate

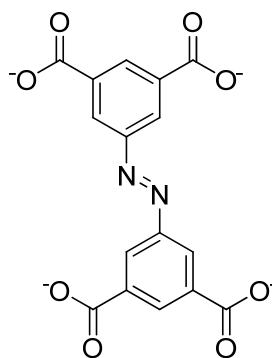

**abtc**

azobenzene-3,3',5,5'-tetracarboxylate

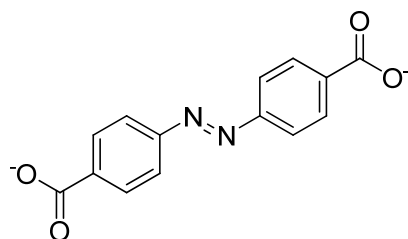

**adc**

4,4'-azobenzenedicarboxylate

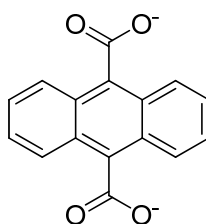

**atdc**

9,10-anthracenedicarboxylate

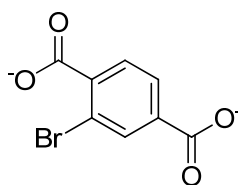

**bbdc**

2-bromobenzene-1,4-dicarboxylate

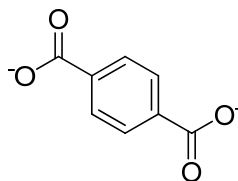

**bdc**

1,4-benzenedicarboxylate

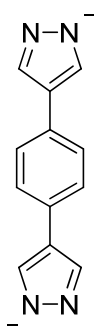

**bdp**

1,4-benzenedi(4'-pyrazolyl)

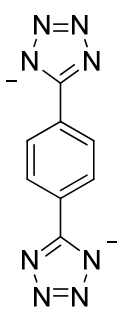

**bdt**

1,4-benzeneditetrazolate

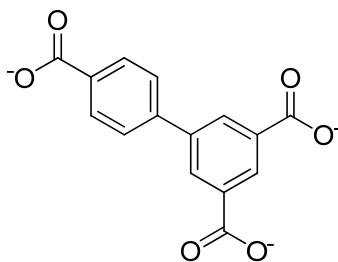

**bhtc**

biphenyl-3,4',5-tricarboxylate

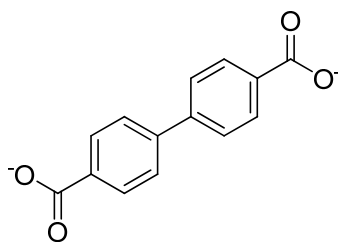

**bpdc**

4,4'-biphenyldicarboxylate

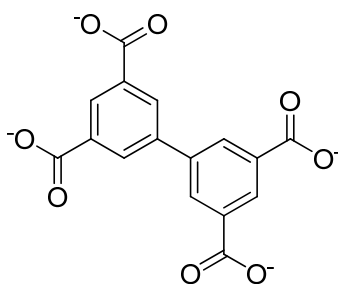

**bptc**

3,3',5,5'-biphenyltetracarboxylate

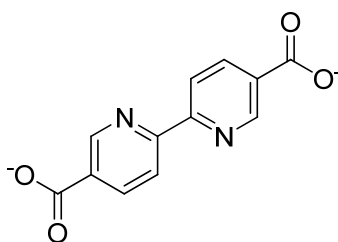

**bpydc**

2,2'-bipyridyl-5,5'-dicarboxylate

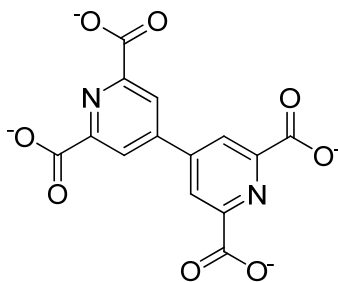

**bpytc**

4,4'-bipyridine-2,6,2',6'-tetracarboxylate

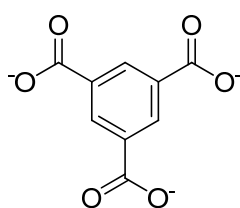

**btc**

1,3,5-benzenetricarboxylate

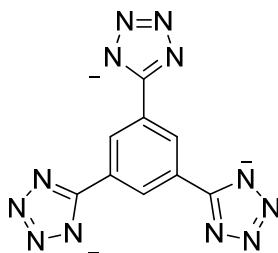

**btt**

1,3,5-benzenetristetrazolate

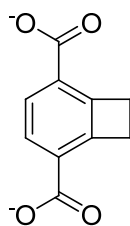

**cbbdc**

1,2-dihydrocyclobutabenzene-3,6-dicarboxylate

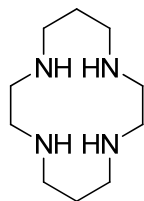

**cyclam**

1,4,8,11-tetraazacyclotetradecane

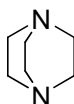

**dabco**

1,4-diazabicyclo[2.2.2]octane

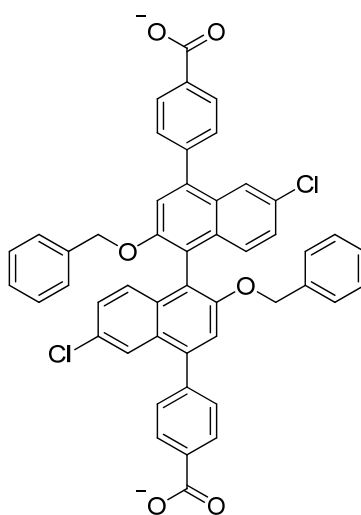

**Dbbd**

6,6'-dichloro-2,2'-dibenzyloxy-1,1'-binaphthyl-4,4'-dibenzoate

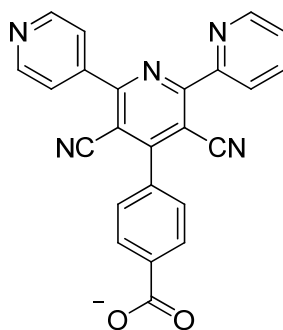

**dccptp**

3,5-dicyano-4-(4-carboxyphenyl)-2,2':6'4''-terpyridine

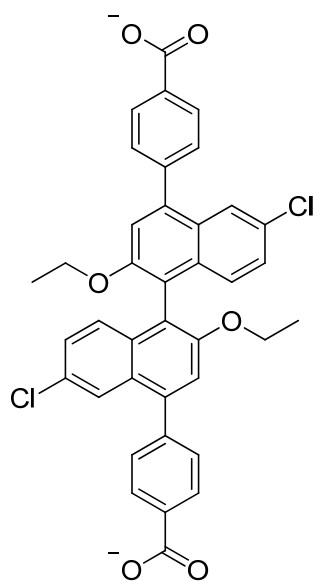

**debd**

6,6'-dichloro-2,2'-diethoxy-1,1'-binaphthyl-4,4'-dibenzoate

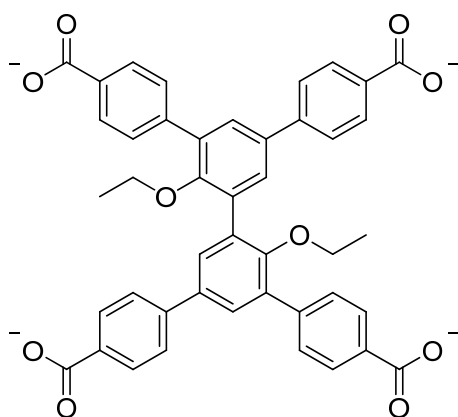

**detkb**

2,2'-diethoxybiphenyl-3,3',5,5'-tetra-kis(benzoate)

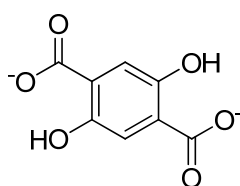

**dhbdc**

2,5-dihydroxybenzene-1,4-dicarboxylate



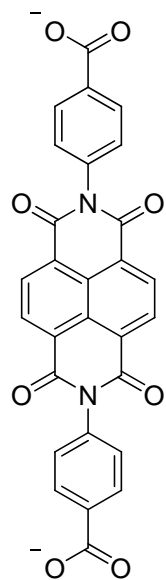

**dipyni**

N,N'-di-(4-pyridyl)-1,4,5,8-naphthalenetetracarboxydiimide

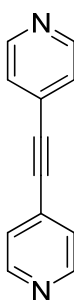

**dpac**

4,4'-dipyridylacetylene

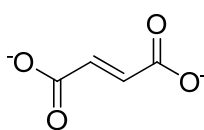

**fma**

fumarate

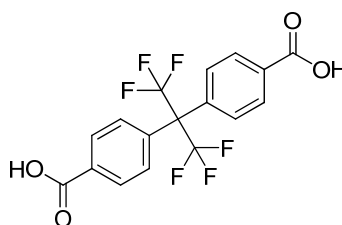

**hfipbb**

4,4'-(hexafluoroisopropylidene)bis(benzoate)

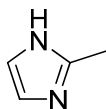

**meim**

2-methylimidazole

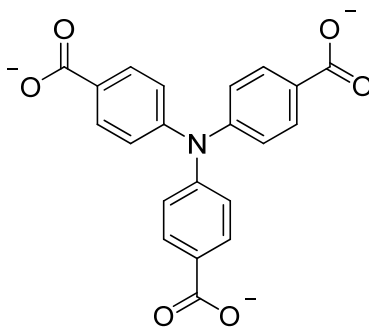

**ntb**

4,4',4''-nitrotrisbenzoic acid

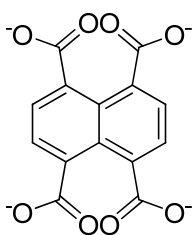

**ntc**

naphthalene-1,4,5,8-tetracarboxylate

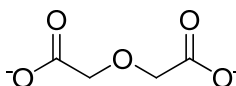

**oxdc**

oxydiacetate

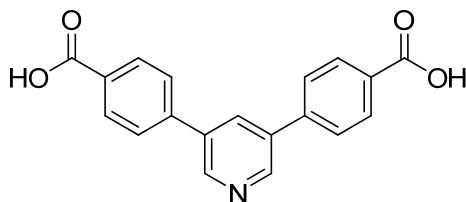

**pbpc**

pyridine-3,5-bis(phenyl-4-carboxylate)

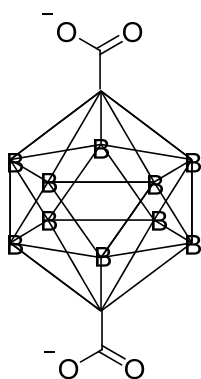

**p-cdc**

1,12-dihydroxy-carbonyl-1,12-dicarba-closo-dodecaborane

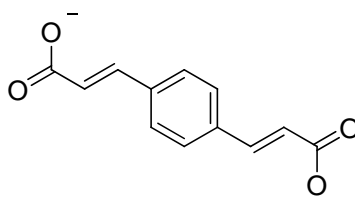

**pda**

p-phenylenediacrylate

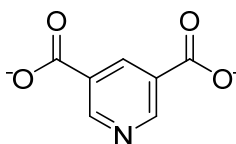

**pdc**

pyridine-3,5-dicarboxylate

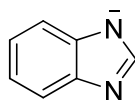

**phim**

benzimidazolone

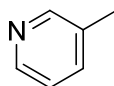

**pic**

3-picoline

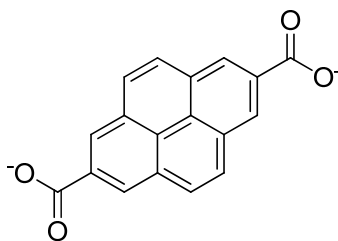

**pydc**  
pyrene-2,7-dicarboxylate

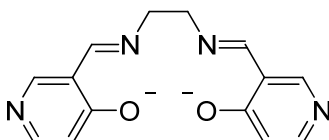

**pyen**  
3,3'-(1E,1'E)-(ethane-1,2-diylbis(azan-1-yl-1-ylidene))bis(methan-1-yl-1-ylidene)dipyridin-4-olate

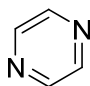

**pyz**  
pyrazine

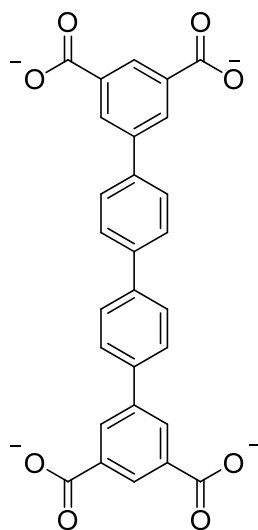

**qptc**  
quaterphenyl-3,3'',5,5''-tetracarboxylate

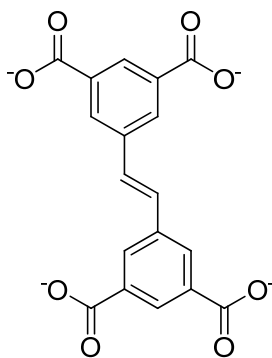

**sbtc**

trans-stilbene-3,3',5,5'-tetracarboxylate

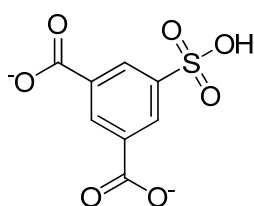

**sip**

5-sulfoisophthalate

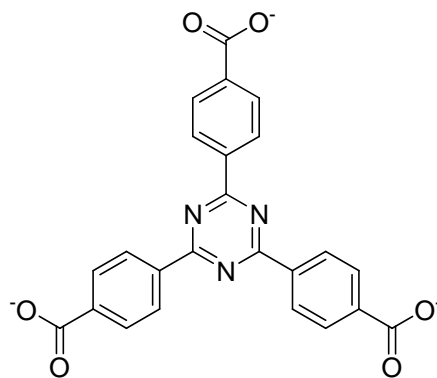

**tatb**

4,4',4''-s-triazine-2,4,6-triyltribenzoate

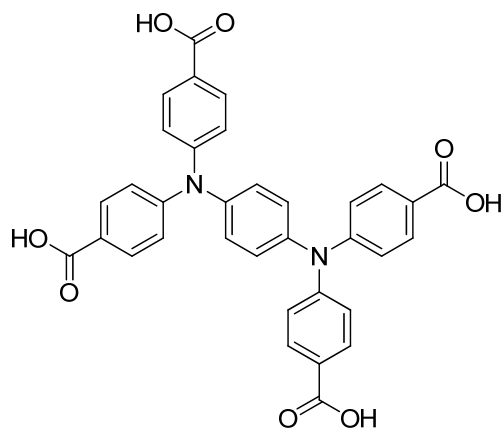

**tcppda**

N,N,N',N'-tetrakis(4-carboxyphenyl)-1,4-phenylenediamine

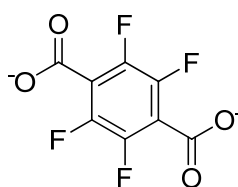

**tfbdc**

tetrafluoroterephthalate

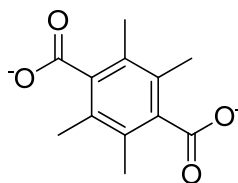

**tmbdc**

tetramethylterephthalate

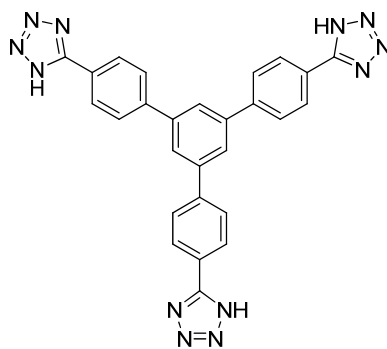

**tpb-3tz**

1,3,5-tri-p-(tetrazol-5-yl)phenylbenzene

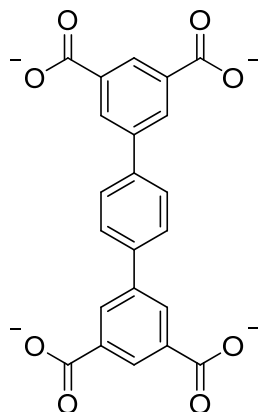

**tptc**

terphenyl-3,3'',5,5''-tetracarboxylate

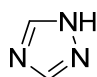

**trz**

1,2,4-triazole

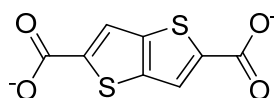

**ttdc**

thieno[3,2-b]thiophene-2,5-dicarboxylate

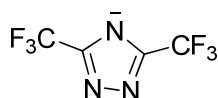

**tz**

3,5-bis(trifluoromethyl)-1,2,4-triazolate

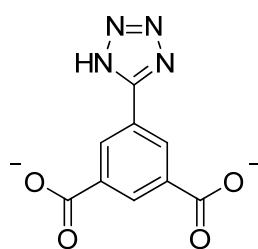

**tzi**

5-tetrazolylisophthalate
